# Supplementary material for: An evolutionary ‘intermediate state’ of mitochondrial translation systems found in Trichinella species of parasitic nematodes: co-evolution of tRNA and EF-Tu
Source: PubMed Central journal article supplement — Nucleic Acids Res. 2006 Sep 29;34(18):5291–9. doi: 10.1093/nar/gkl526 (PMC1636415; doi:10.1093/nar/gkl526), 2006-09-29
Supplement: nar_gkl526_1.pdf [file nar_gkl526_1.pdf]

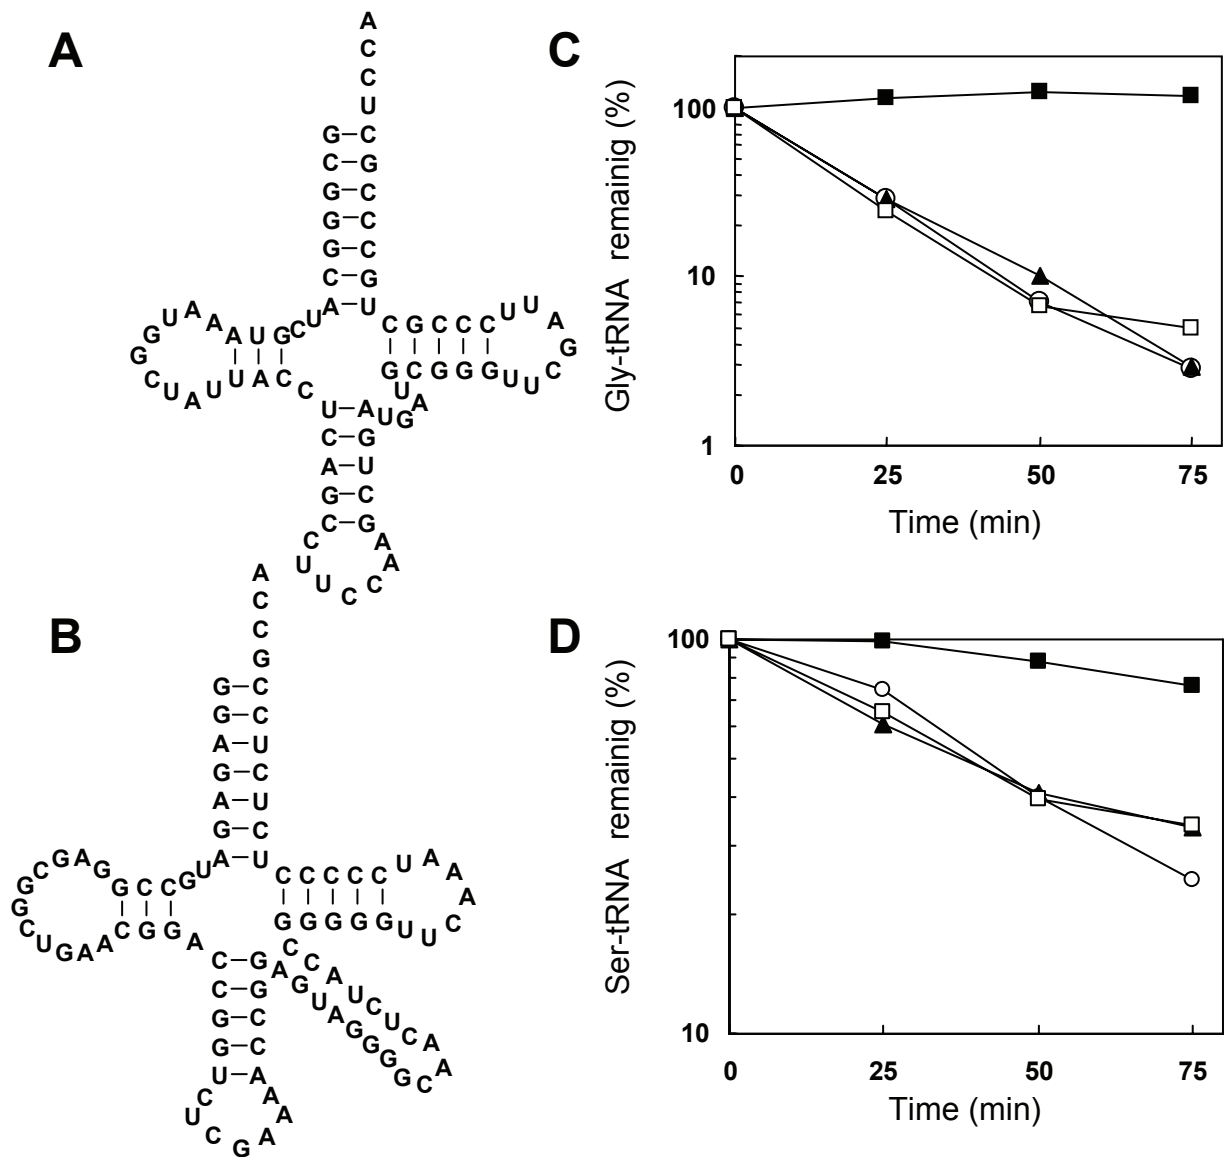

**Supplementary Figure 1. Binding of EF-Tu1 and EF-Tu2 to cloverleaf tRNAs.** (A, B) Secondary structures of *E. coli* tRNA<sup>Gly</sup> (A) and tRNA<sup>Ser</sup> (B). (C, D) deacylation-protection assay using *E. coli* Gly-tRNA<sup>Gly</sup> (C) and *E. coli* Ser-tRNA<sup>Ser</sup> (D). These assays were performed in the presence of *T. britovi* EF-Tu1 (filled triangles), *T. britovi* EF-Tu2 (open squares), *E. coli* EF-Tu (filled squares), and in the absence of EF-Tu (open circles).

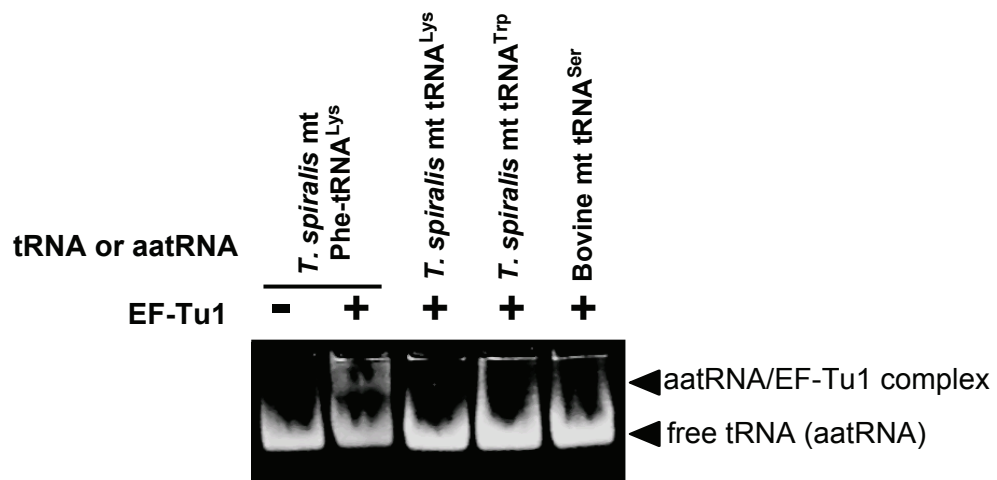

**Supplementary Figure 2. Binding of EF-Tu1 to three types of tRNAs.** *T. spiralis* mt tRNA<sup>Lys</sup>, *T. spiralis* mt tRNA<sup>Trp</sup>, and bovine mt tRNA<sup>Ser</sup> in the presence of EF-Tu1 were analyzed by gel mobility shift assay under the conditions described in the Materials and Methods. *T. spiralis* mt Phe-tRNA<sup>Lys</sup> in the presence or absence of EF-Tu1 was also analyzed. The gel was stained with ethidium bromide.
